# Supplementary material for: The Relationship between the Anticyclonic Anomalies in Northeast Asia and Severe Haze in the Beijing–Tianjin–Hebei Region
Source: Copernicus journal article supplement (doi:10.5194/acp-2018-782), 2018-10-25
Supplement: Supplementary file 1 [file acp-2018-782-supplement.pdf]

Supplement

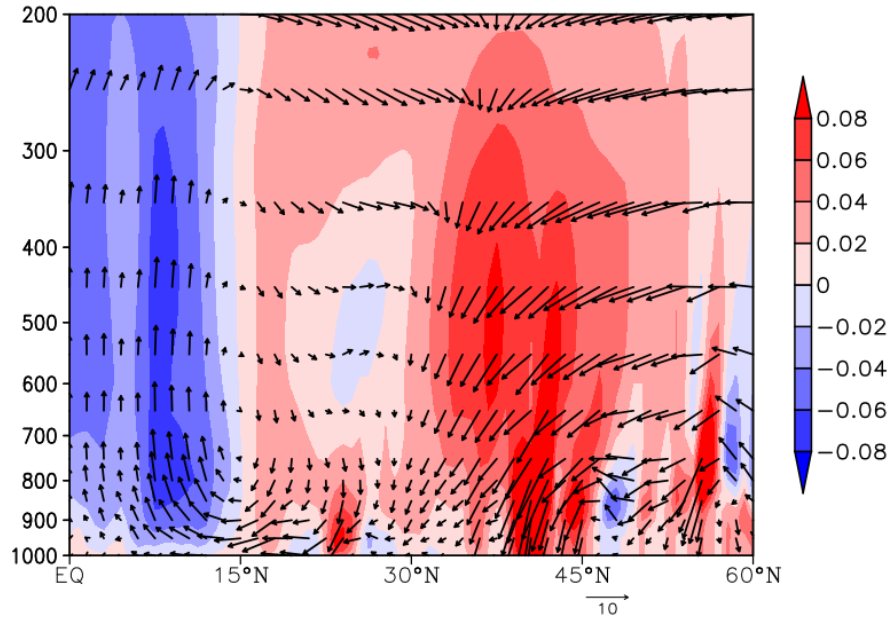

**Figure S1.** The 1979-2010 climatology of the local meridional circulation (114°-120°E mean). Omega, shading, units:  $\text{Pa} \cdot \text{s}^{-1}$ ; wind, arrow, omega magnified 100 times, units:  $\text{m} \cdot \text{s}^{-1}$ . To make the horizontal velocity and the vertical velocity in the same order, the vertical velocity (omega) here is magnified 100 times.
